# Supplementary material
Source: Springer Nature journal article supplement (https://www.springermedizin.de/resource/supplementary/13054_2012_1921_MOESM4_ESM.pdf/9711884)

## Survivor

Yes

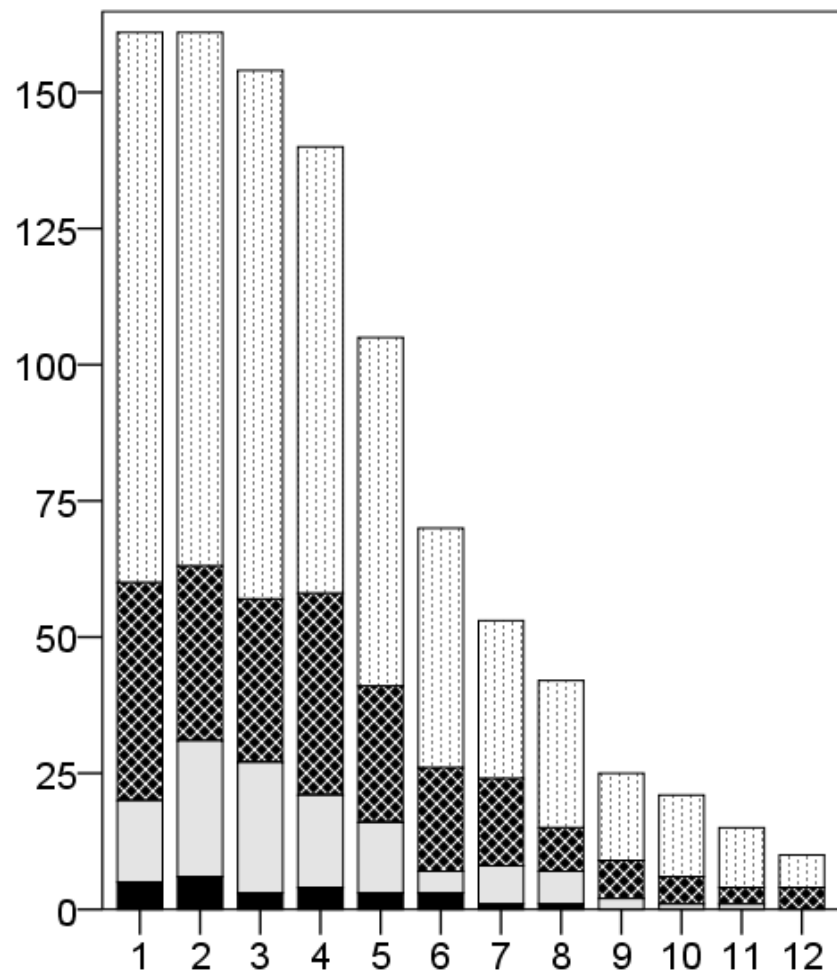

No

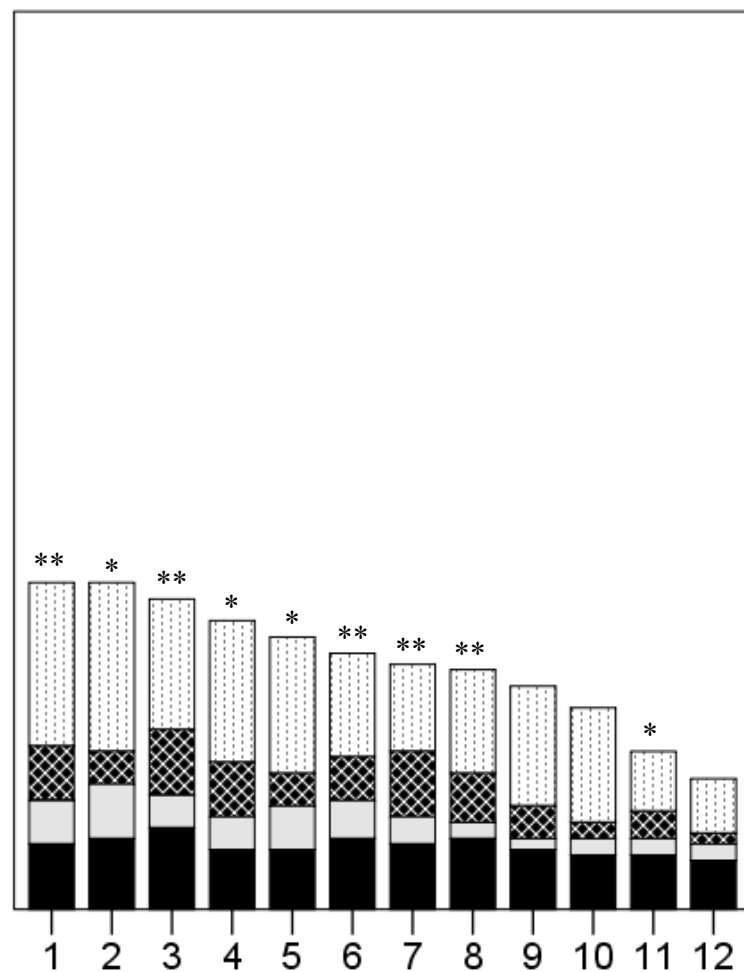

Non-AKI  
Risk  
Injury  
Failure

Day of ECMO treatment

Supplement: MOESM4 [file 9711884]
